# Supplementary material for: The influence of Fe3+ doping on thermally induced crystallization and phase evolution of amorphous calcium phosphate
Source: Royal Society of Chemistry journal article supplement (doi:10.1039/d1ce00371b), 2021-01-01
Supplement: d1ce00371b1.pdf [file d1ce00371b1.pdf]

## Supplementary information

### The influence of Fe<sup>3+</sup> doping on thermally induced crystallization and phase evolution of amorphous calcium phosphate

Diana Griesiute<sup>1</sup>, Lauryna Sinusaite<sup>1</sup>, Agne Kizalaite<sup>1</sup>, Andris Antuzevics<sup>2</sup>, Kestutis Mazeika<sup>3</sup>, Dalis Baltrunas<sup>3</sup>, Tomoyo Goto<sup>4</sup>, Tohru Sekino<sup>4</sup>, Aivaras Kareiva<sup>1</sup>, Aleksej Zarkov<sup>1,\*</sup>

<sup>1</sup>*Institute of Chemistry, Vilnius University, Naugarduko 24, LT-03225 Vilnius, Lithuania*

<sup>2</sup>*Institute of Solid State Physics, University of Latvia, Kengaraga 8, LV-1063 Riga, Latvia*

<sup>3</sup>*State Research Institute Center for Physical Sciences and Technology, Vilnius LT-02300, Lithuania*

<sup>4</sup>*The Institute of Scientific and Industrial Research, Osaka University, 8-1 Mihogaoka, Ibaraki, Osaka 567-0047, Japan*

\*Author to whom correspondence should be addressed. E-mail: [aleksej.zarkov@chf.vu.lt](mailto:aleksej.zarkov@chf.vu.lt)

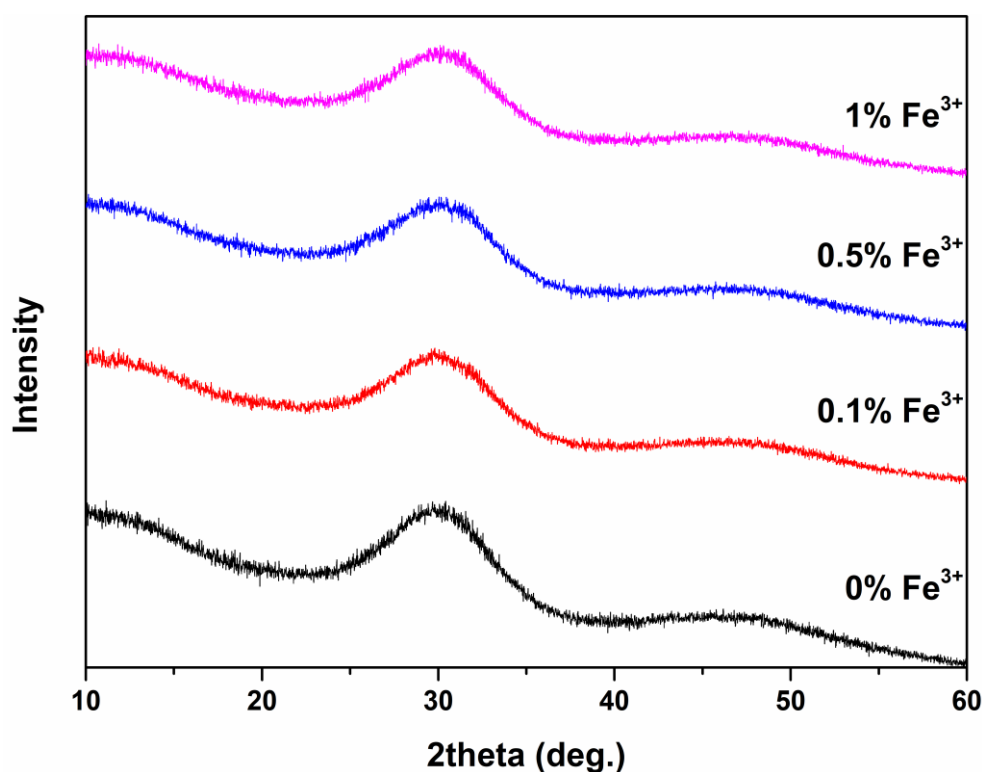

**Figure S1.** XRD patterns of as-prepared ACP powders substituted with different amounts of Fe<sup>3+</sup> ions.

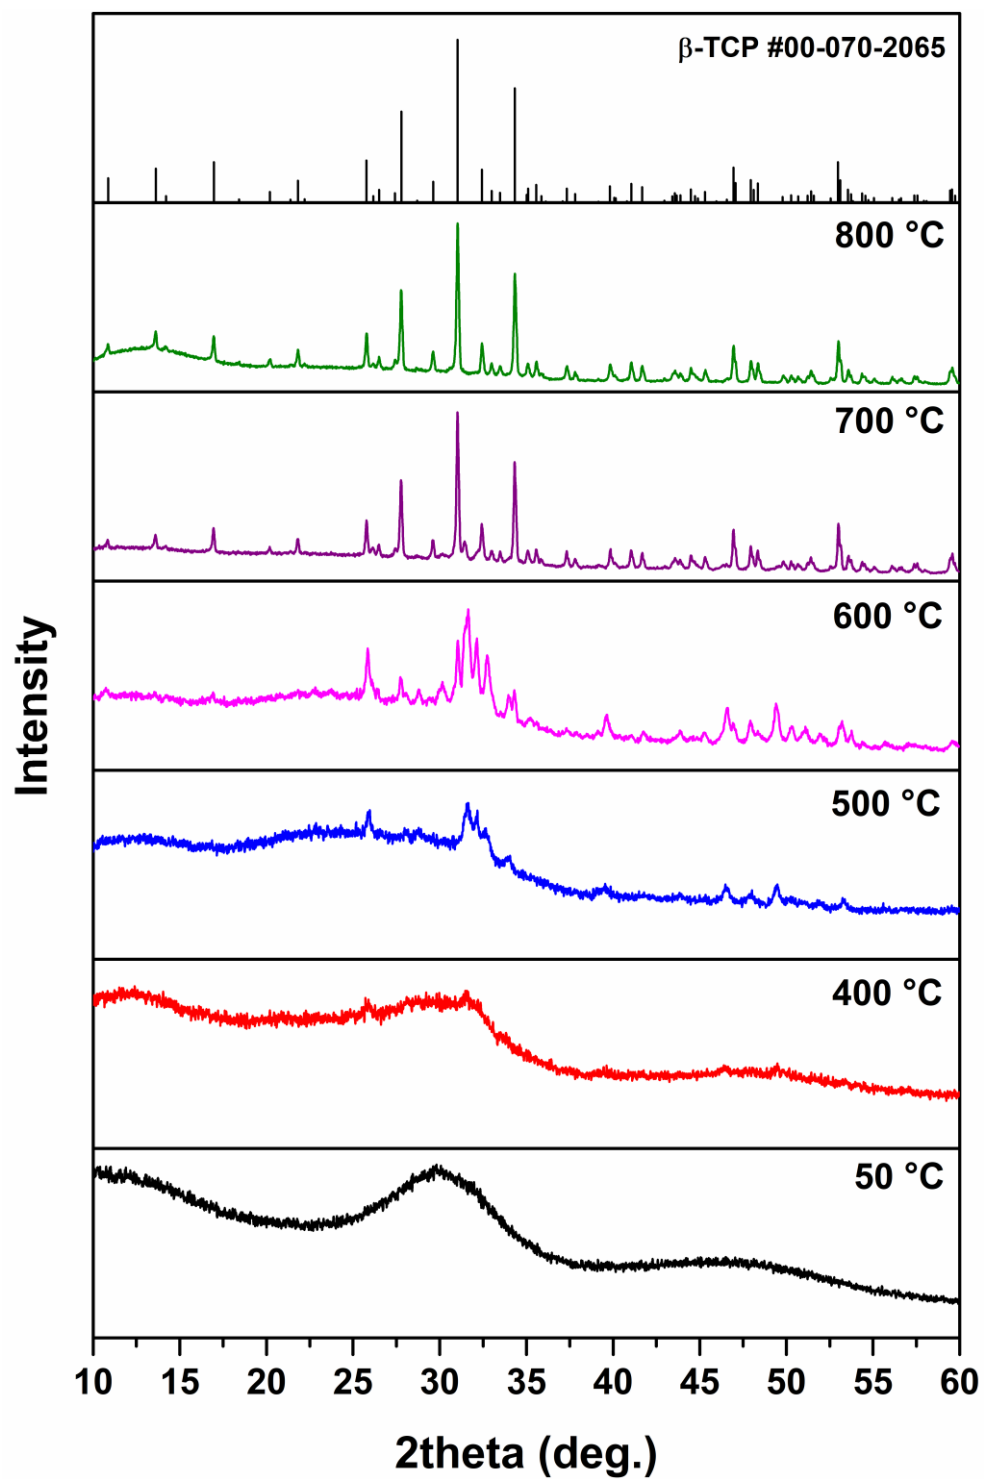

**Figure S2.** XRD patterns of ACP substituted with 0.1 mol% of  $\text{Fe}^{3+}$  ions and annealed at different temperatures.

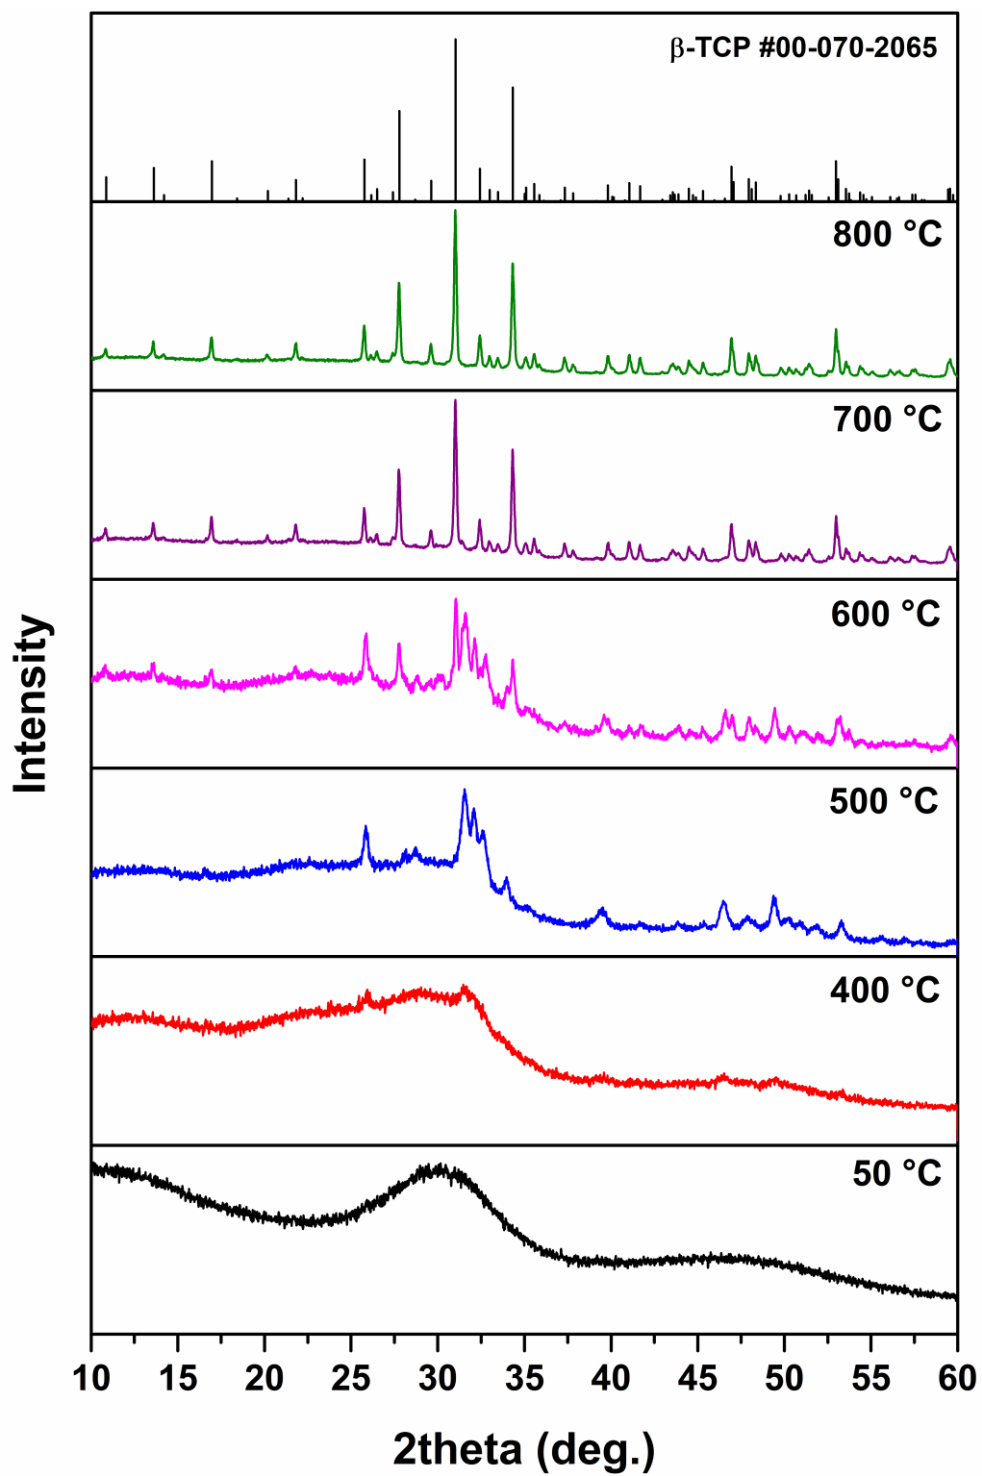

**Figure S3.** XRD patterns of ACP substituted with 0.5 mol% of  $\text{Fe}^{3+}$  ions and annealed at different temperatures.

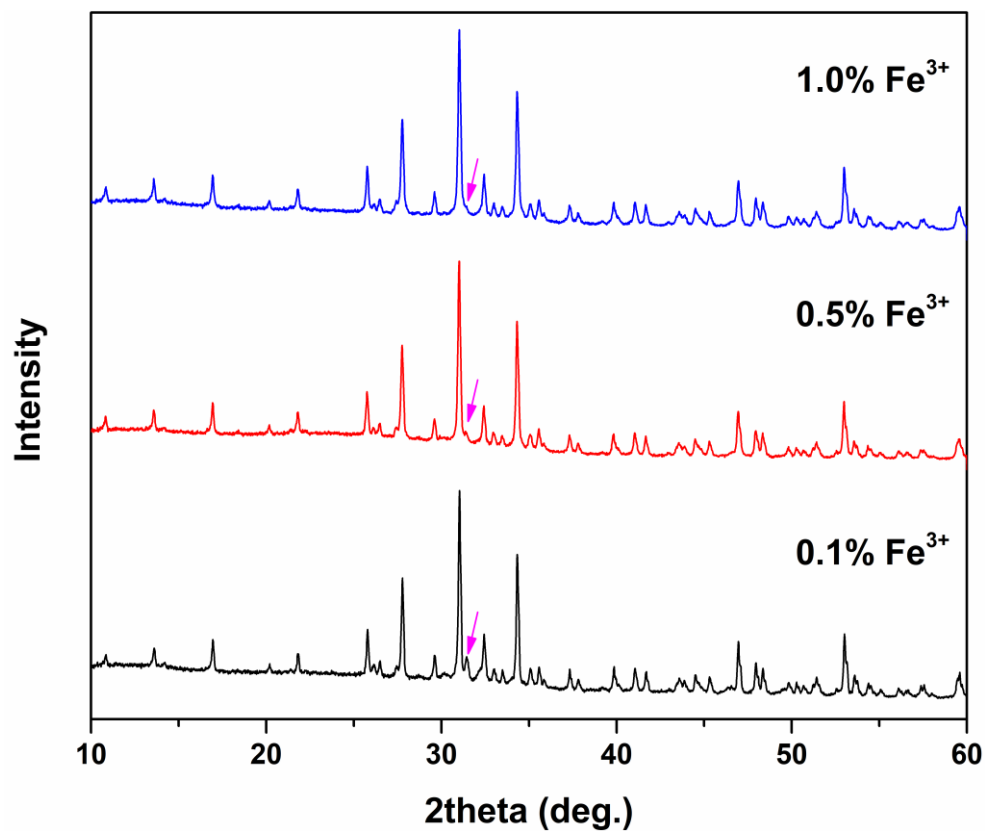

**Figure S4.** XRD patterns of ACP substituted with different amounts of Fe<sup>3+</sup> ions and annealed at 700 °C. The pink arrow indicates the residual non-decomposed CDHA precursor.

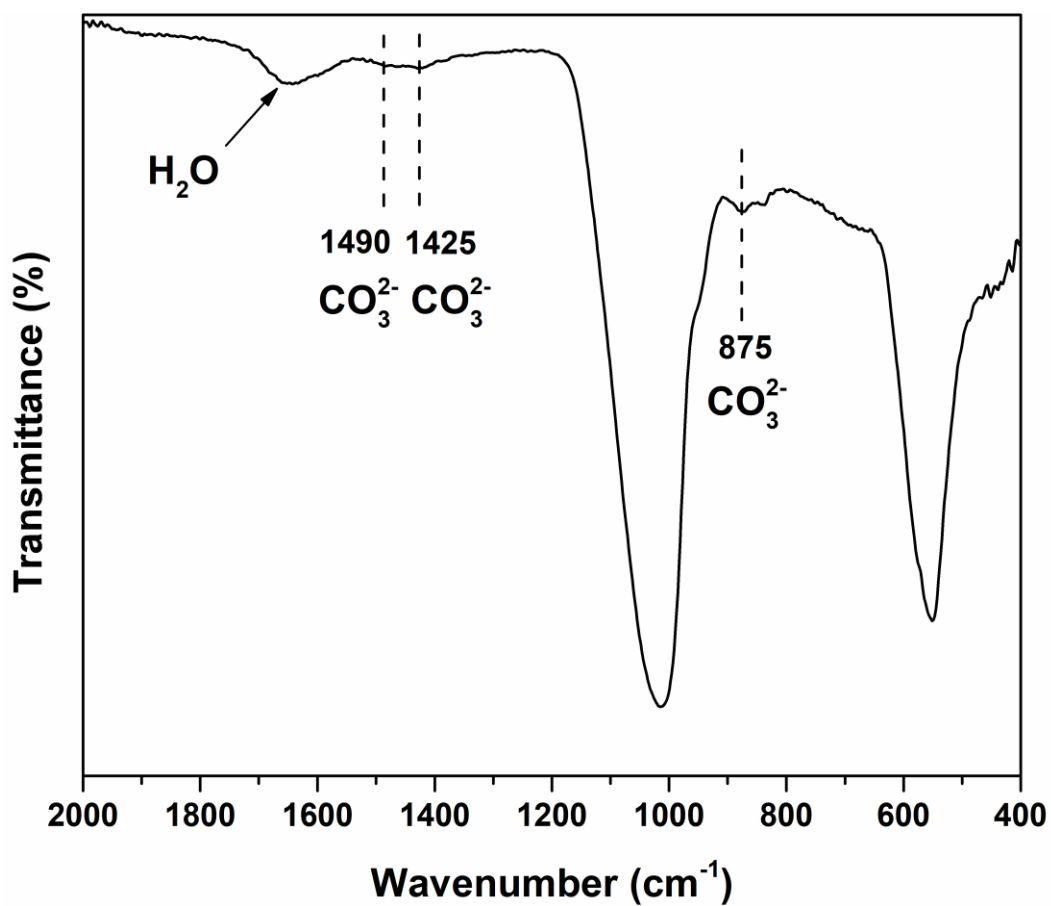

Figure S5. FTIR spectrum of as-prepared ACP substituted with 1 mol% of  $\text{Fe}^{3+}$  ions.
